# Supplementary material for: Environmentally friendly and facile synthesis of Rh nanoparticles at room temperature by alkaline ethanol solution and their application for ethanol electrooxidation
Source: Royal Society of Chemistry journal article supplement (doi:10.1039/c6ra26591j), 2017-01-01
Supplement: c6ra26591j1.pdf [file c6ra26591j1.pdf]

## Electronic Supplementary Information (ESI)

### Environmentally friendly and facile synthesis of Rh nanoparticles at room temperature by alkaline ethanol solution and their application for ethanol electrooxidation

Fuhai Li,<sup>a</sup> Hanqin Weng,<sup>a</sup> Yun Shang,<sup>a</sup> Zuoming Ding,<sup>a</sup> Zheng Yang,<sup>a</sup> Sheng Cheng,<sup>b</sup> and Mingzhang Lin<sup>a,c,\*</sup>

<sup>a</sup> School of Nuclear Science and Technology, University of Science and Technology of China, Hefei 230026, P. R. China.

<sup>b</sup> Instrumental Analysis Center, Hefei University of Technology, Hefei 230009, P. R. China.

<sup>c</sup> Institute of Nuclear Energy Safety Technology, Chinese Academy of Sciences, Hefei 230031, P. R. China.

\*Corresponding Author. Email: [gelin@ustc.edu.cn](mailto:gelin@ustc.edu.cn)

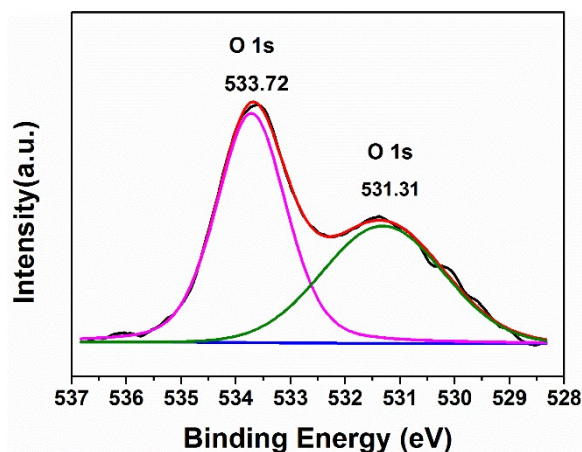

**Figure S1.** O 1s XPS spectrum of the RhNps. Condition of synthesis: 1 mM RhCl<sub>3</sub>, 1 M ethanol and 1 M NaOH at 20 °C.

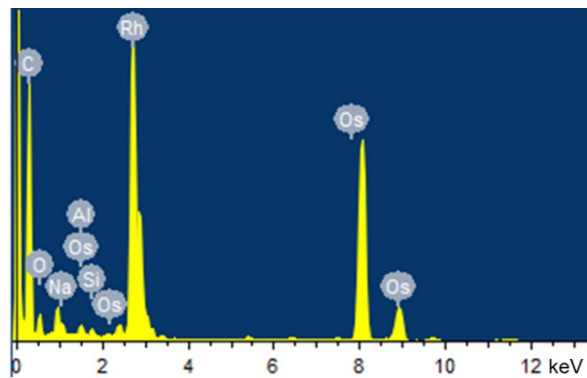

**Figure S2.** EDX of the RhNps. Condition of synthesis: 1 mM  $\text{RhCl}_3$ , 1 M ethanol and 1 M NaOH at 20 °C.

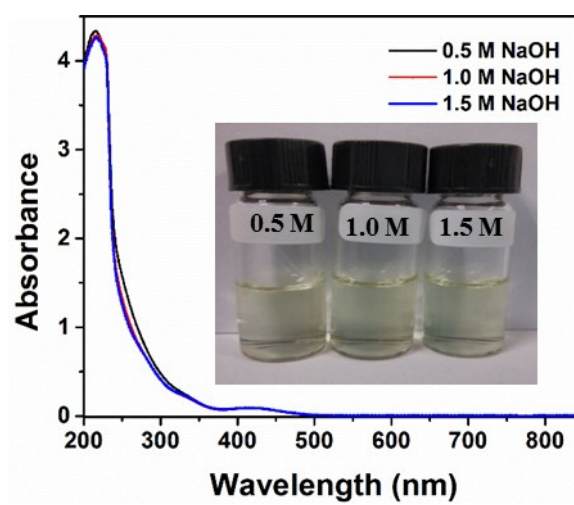

**Figure S3.** UV-vis spectra of the solution containing 1 mM  $\text{RhCl}_3$ , 50 mM PVP, and 0.5, 1.0, 1.5 M NaOH. The inset shows the color of the solution.

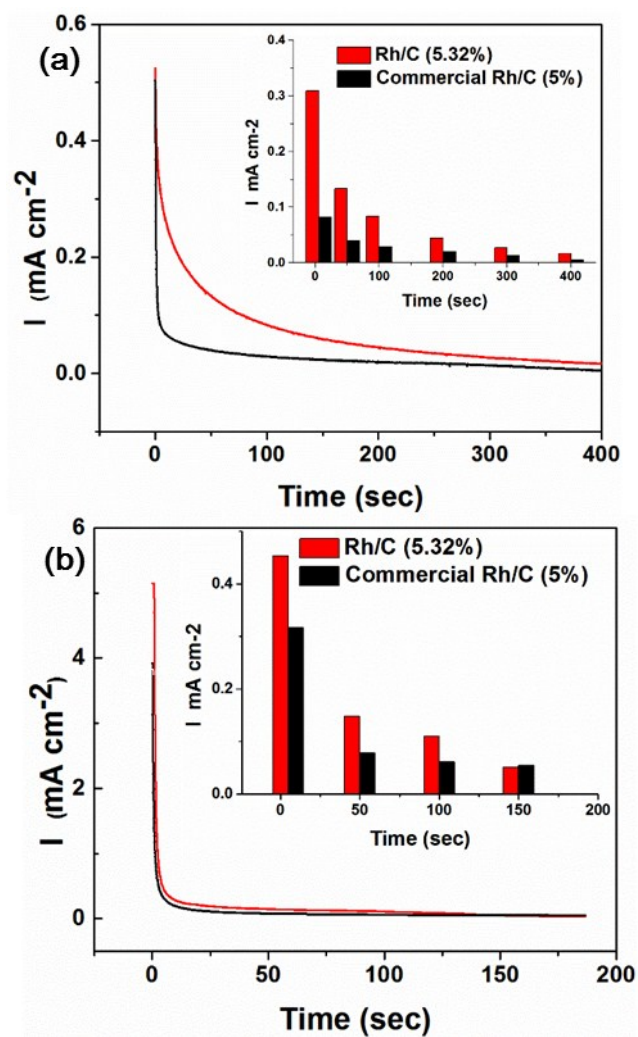

Figure S4. Amperometric I-t curves of as-synthesized and commercial Rh/C in 1 M ethanol and 0.1 M NaOH solution at a constant potential of (a) -0.5 and (b) 0 V.

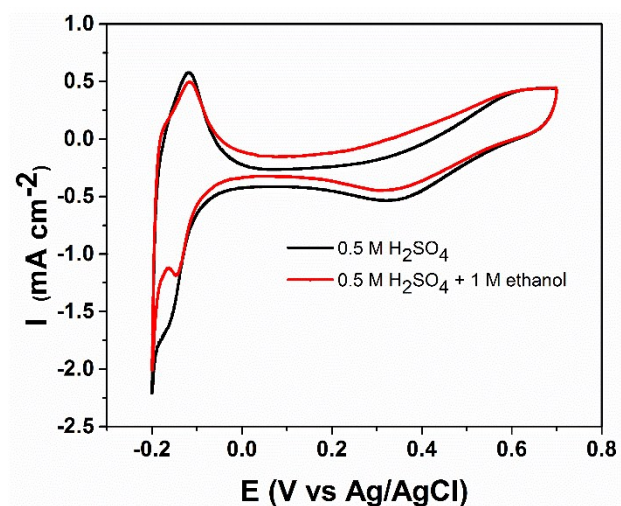

Figure S5. Cyclic voltammograms (CVs) of Rh/C in 0.5 M H<sub>2</sub>SO<sub>4</sub> solution with and without 1 M ethanol at 25 °C with a scan rate of 50 mV/s.
